# Supplementary material for: The Northern Adriatic Forecasting System for Circulation and Biogeochemistry: Implementation and Preliminary Results
Source: MDPI journal article supplement (doi:10.3390/w14172729), 2022-09-01
Supplement: s1 [file s1]

Archive with 1 entries (1 files):
- water-1821653-supplementary.pdf
