# Supplementary material for: The Northern Adriatic Forecasting System for Circulation and Biogeochemistry: Implementation and Preliminary Results
Source: MDPI journal article supplement (doi:10.3390/w14172729), 2022-09-01
Supplement: s1 [file s1 › water-1821653-supplementary.pdf]

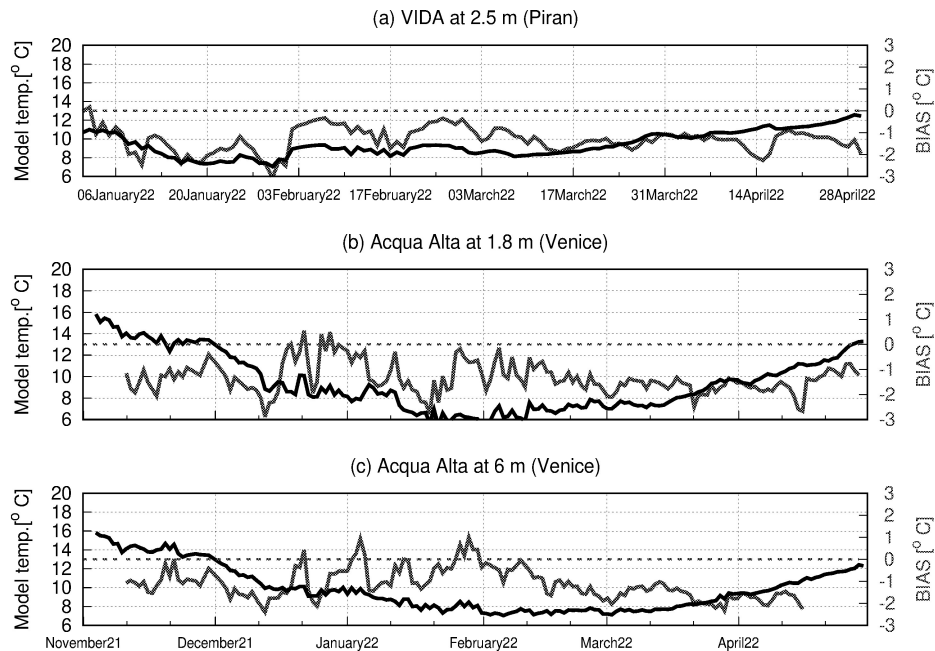

**Figure S1.** Model-fixed buoy temperature comparison. (a) VIDA buoy, (b) Acqua alta (1.8 m depth), (c) Acqua Alta (6 m depth). Black line model temperature, Blue line bias.
